# Supplementary material
Source: publisher figshare collection journal article supplement (https://tandf.figshare.com/ndownloader/files/34514884)
Supplement: Supplementary file 1 [file 34514884]

Supplement Table 1. Univariate logistic regression of craving, substance dependence and MiL associated with relapse

|  | ***B*** | **SE** | ***Z*** | ***p*-value** | **Odds ratio** | **95% CI odds ratio** |
| --- | --- | --- | --- | --- | --- | --- |
| **Any use at 6-month FU** | | | | | | |
| Craving | .052 | .037 | 1.98 | *.16* | 1.05 | 0.98-1.13 |
| Substance dependence | .063 | .029 | 3.58 | *.06* | 1.07 | 1.00-1.14 |
| Presence of MiL | .003 | .029 | 0.01 | .92 | 1.00 | 0.95-1.06 |
| **≥ 3 consecutive days use at 6-month FU** | | | | | | |
| Craving | .032 | .036 | 0.79 | .38 | 1.03 | 0.96-1.11 |
| Substance dependence | .041 | .033 | 1.56 | .21 | 1.04 | 0.98-1.11 |
| Presence of MiL | .053 | .033 | 2.49 | .11 | 1.04 | 0.99-1.13 |
| **Any use at 12-month FU** | | | | | | |
| Craving | .098 | .056 | 3.06 | .08 | 1.10 | 0.99-1.23 |
| Substance dependence | .073 | .045 | 2.66 | .10 | 1.08 | 0.99-1.17 |
| Presence of MiL | .035 | .037 | 0.93 | .33 | 1.04 | 0.96-1.11 |
| **≥ 3 consecutive days use at 6-month FU** | | | | | | |
| Craving | .067 | .045 | 2.16 | .14 | 1.07 | 0.98-1.67 |
| Substance dependence | .012 | .039 | 0.10 | .75 | 1.01 | 0.94-1.09 |
| Presence of MiL | .011 | .036 | 0.096 | .76 | 1.01 | 0.94-1.09 |
